# Supplementary material
Source: PubMed Central journal article supplement (PMC8026959)
Supplement: 41433_2020_927_MOESM1_ESM.pdf [file 41433_2020_927_MOESM1_ESM.pdf]

# Supplementary Information

## Example Images

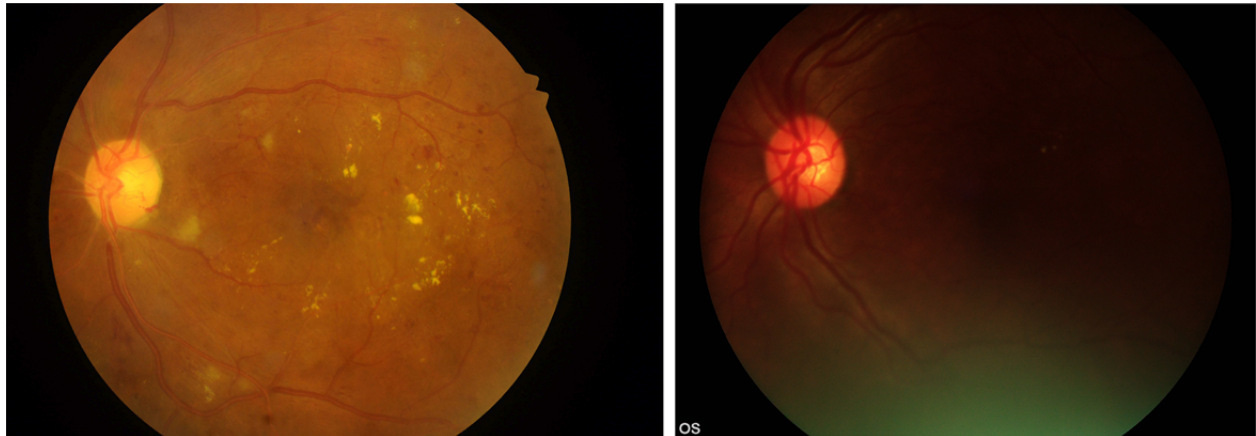

**Figure S1.** Examples of images used in this study. *Left:* From the benchmark dataset (IDRiD), captured using a desktop (VX-10 alpha, Kowa American Corp., USA) fundus camera. *Right:* From MAILOR, captured using a portable handheld (Pictor Plus, Volk Optical Inc., USA) fundus camera.

## Consort-Style Diagram

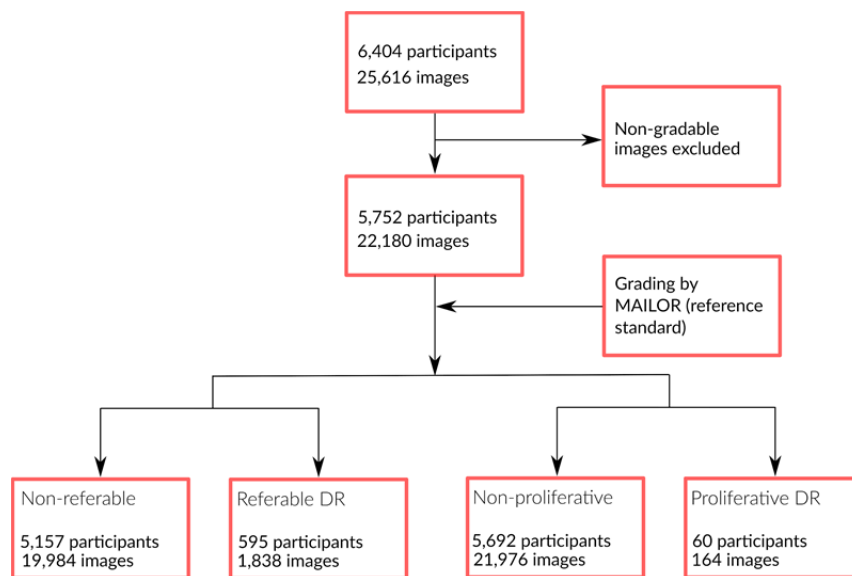

**Figure S2.** CONSORT-style diagram for the MAILOR cohort.
